# Supplementary material for: Protein arginine methylation facilitates KCNQ channel-PIP2 interaction leading to seizure suppression
Source: eLife. 2016 Jul 28;5:e17159. doi: 10.7554/eLife.17159 (PMC4996652; doi:10.7554/eLife.17159)
Supplement: Figure 3—figure supplement 1—source data 1. — DOI: http://dx.doi.org/10.7554/eLife.17159.010 [file elife-17159-fig3-figsupp1-data1.xlsx]

## Sheet: SFig1
WT
Left		right
Pre-XE991	Post-XE991	difference
-95	-90	5
-80	-81	-1
-86	-87	-1
-88	-85	3
-82	-73	9
-95	-85	10
-93	-80	13
-86	-84	2
-88	-88	0
-82	-84	-2
-85	-74	11
	mean	4.45455
	SEM	1.64241
WT
Left		right
Pre-XE991	Post-XE991	difference
-84	-82	2
-82	-81	1
-82	-81	1
-87	-91	-4
-85	-87	-2
-89	-86	3
-92	-94	-2
-84	-86	-2
-80	-80	0
-67	-70	-3
-72	-76	-4
	mean	-0.90909
	SEM	0.7318
