# Supplementary material for: Protein arginine methylation facilitates KCNQ channel-PIP2 interaction leading to seizure suppression
Source: eLife. 2016 Jul 28;5:e17159. doi: 10.7554/eLife.17159 (PMC4996652; doi:10.7554/eLife.17159)
Supplement: Figure 7—figure supplement 2—source data 1. — DOI: http://dx.doi.org/10.7554/eLife.17159.026 [file elife-17159-fig7-figsupp2-data1.xlsx]

## Sheet: Sfig12
panel f
	WT		R333K		R345K		R353K		R435K
1	23.7612	2.60244	8.02767	2.01877	7.60194	1.53762	5.21537	2.49942	2.73009	0.1498
2	27.2	6.09478	8.45752	5.57714	7.84239	5.62586	6.03196	4.31907	3.55862	0.40345
3	39.5504	11.2214	10.6896	8.24271	10.0774	4.23077	6.29821	4.92946	4.40381	2.93333
4	36.1102	8.58437	9.34933	0.92	7.17527	0.38434	5.62219	0.67768	6.39244	0.76308
5	23.003	5.6	8.06809	1.22447	4.72099	2.65926	10.6996	5.85272	4.4707	1.03516
6	46.57	8.19
7	34.23	6.13
8	39.921	6.18
9	56.8	12.4
mean	36.3495	7.44478	12.3014	5.82747	7.4836	2.88757	6.77346	3.65567	4.31113	1.05696
SEM	3.67147	1.00466	3.30419	3.03732	0.85434	0.93389	0.99857	0.92453	0.60958	0.49283
panel g
	WT	R333K	R345K	R353K	R435K
1	10	27	28	32	14
2	18	10	20	41.5	22.5
3	4	24	26	30.5	17.5
4	6	32	27.5	30.5	19.5
5	11.2	21	19	26	16
6	17.5
7	12.7
8	13.5
9	12.1
mean	9.5	22.8	24.1	32.1	17.9
SEM	3.0957	3.67967	1.91311	2.55636	1.46116
