# Supplementary material for: Protein arginine methylation facilitates KCNQ channel-PIP2 interaction leading to seizure suppression
Source: eLife. 2016 Jul 28;5:e17159. doi: 10.7554/eLife.17159 (PMC4996652; doi:10.7554/eLife.17159)
Supplement: Figure 7—figure supplement 3—source data 1. — DOI: http://dx.doi.org/10.7554/eLife.17159.028 [file elife-17159-fig7-figsupp3-data1.xlsx]

## Sheet: SFig7
Panel a							mean	SEM		Panel b													mean	SEM
WT	Pre-XE991	190	192	215	176	152	185	10.3537		WT	Pre-XE991	12	6	1	6	21	2	4	13	2	12	13	8.36364	1.89388
	Post-XE991	162	150	205	176	112	161	15.3036			Post-XE991	16	10	2	9	23	5	8	17	15	18	16	12.6364	1.89867
PRMT1+/-	Pre-XE991	120	123	123	113	127	121.2	2.33238		PRMT1+/-	Pre-XE991	24	31	21	24	19	25	21	29	28	25		24.7	1.20231
	Post-XE991	110	120	106	113	123	114.4	3.14006			Post-XE991	18	27	18	19	28	32	26	26	34	24		25.2	1.76257
PRMT!+/-; PIP2	Pre-XE991	185	142	193	220		185	16.171		PRMT!+/-; PIP2	Pre-XE991	16	21	9	5								12.75	3.5678
	Post-XE991	143	119	176	165		150.75	12.612			Post-XE991	19	26	11	7								15.75	4.23035
