# Supplementary material for: Protein arginine methylation facilitates KCNQ channel-PIP2 interaction leading to seizure suppression
Source: eLife. 2016 Jul 28;5:e17159. doi: 10.7554/eLife.17159 (PMC4996652; doi:10.7554/eLife.17159)
Supplement: Figure 7—figure supplement 4—source data 1. — DOI: http://dx.doi.org/10.7554/eLife.17159.030 [file elife-17159-fig7-figsupp4-data1.xlsx]

## Sheet: SFig8
Panel b											Panel c			Panel d
	WT										Input resistance			threshold current
	100pA	150pA	200pA	250pA	300pA	350pA	400pA				WT	WT; PIP2		WT	WT; PIP2
	0		12		26		36				175.4	179.6		190	161
	0	1	6	14	21	29	34				177.5	96.3		172	207
	0	0	1	7	13	18	24				116.6	205.2		199	155
	0	2	6	11	18	25	29				122.1	142.8		216	184
	0	11	21	27	33	36	38				156.6	102.7		192	213
	0	4	11	18	26	32	37				116			215
	0	0	7	13	19	25	28				202.2			176
	0	0	7	15	24	31	35				141.9			186
	0	3	12	19	24	29	31				97.7			245
	0	0	0	3	10	17	24
	0	0	2	7	11	14	18
	0	0	4	8	16	23	29
	0	6	13	18	22	27	32			mean	145.111	145.32		199	184
	0	0	2	9	13	15	--			SEM	11.67	21.1973		7.65398	11.7047
	0	0	12	20	26	30	34
	0	4	13	19	26	28	30
mean	0	2.06667	8.0625	13.8667	20.5	25.2667	30.6
SEM	0	0.787552	1.47111	1.65865	1.64063	1.70843	1.38164
	WT; diC8-PIP2
	0	2	6	11	19	24	27
	0	0	8	17	23	28	32
	0	5	12	18	23	28	31
	0	2	12	19	25	30	33
	0	0	7	16	22	28	35
mean	0	1.8	9	16.2	22.4	27.6	31.6
SEM	0	0.91652	1.26491	1.39284	0.9798	0.9798	1.32665
