# Supplementary material for: Protein arginine methylation facilitates KCNQ channel-PIP2 interaction leading to seizure suppression
Source: eLife. 2016 Jul 28;5:e17159. doi: 10.7554/eLife.17159 (PMC4996652; doi:10.7554/eLife.17159)
Supplement: Figure 7—figure supplement 5—source data 1. — DOI: http://dx.doi.org/10.7554/eLife.17159.032 [file elife-17159-fig7-figsupp5-data1.xlsx]

## Sheet: SFig11
panel b	Pre					Apamin					panel e	Pre					Apamin					panel h	Pre					Paxilline					panel k	Pre					Paxilline
# Cell	100 pA	150 pA	200 pA	250 pA		100 pA	150 pA	200 pA	250 pA		# Cell	100 pA	150 pA	200 pA	250 pA		100 pA	150 pA	200 pA	250 pA		# Cell	100 pA	150 pA	200 pA	250 pA		100 pA	150 pA	200 pA	250 pA		# Cell	100 pA	150 pA	200 pA	250 pA		100 pA	150 pA	200 pA	250 pA
sy-0235	0	1	6	11		0	5	13	17		sy-0232	17	27	33			21	31				sy-0248	6	16	21	23		7	15	20	24		sy-0256	13	19	25	29		13	18	24
sy-0236	5	13	19	23		7	16	23	29		sy-0233	13	20	24	26		19	23	26	31.4286		sy-0249	7	13	18	23		7	14	20	25		sy-0259	8	16	23	28		7	15	22	28
sy-0237	7	17	23	27		22	27	33	35		sy-0243	10	19	26	32		21	29	37			sy-0250	4	12	15			5	11	12			sy-0260	11	16	23	27		11	16	23	27
sy-0238	4	14	22	31		12	22	28	32		sy-0244	13	20	23			17	24	28			sy-0251	0	11	17	21		0	6	12	17		sy-0261	11	22	26	33		13	23	27	31
sy-0239	6	14	22	28		14	25	33	40		sy-0245	6	16	24	31		14	25	35	39		sy-0252	5	11	16	18		5	12	17	21
sy-0229	0	5	13	16		4	10	14	16		sy-0246	16	24	29	32		19	25	30	36		sy-0253	1	9	15	19		1	8	14	19		Mean	10.75	18.25	24.25	29.25		11	18	24	28.6667
											sy-0247	13	20	23			20	30															SEM	1.03078	1.43614	0.75	1.31498		1.41421	1.77951	1.08012	1.20185
Mean	3.66667	10.6667	17.5	22.6667		9.83333	17.5	24	28.1667													Mean	3.83333	12	17	20.8		4.16667	11	15.8333	21.2		p value	0.717686	0.637618	0.637618	0.42265
SEM	1.22927	2.53859	2.74165	3.14819		3.2085	3.56604	3.65148	3.97841		Mean	12.5714	20.8571	26	30.25		18.7143	26.7143	31.2	35.4762		SEM	1.13774	0.966092	0.930949	1.0198		1.22247	1.41421	1.51474	1.49666
p value	0.0377001	0.00391855	0.00793478	0.0294152							SEM	1.39484	1.35275	1.41421	1.43614		0.944011	1.20937	2.08327	2.20132		p value	0.174688	0.314373	0.315479	0.757228
											p value	0.00113529	0.00587795	0.0489354	0.0382663
panel c	Pre	Apamin	Pre	Apamin		panel f	Pre	Apamin	Pre	Apamin		panel i	Pre	Paxilline	Pre	Paxilline		panel l	Pre	Paxilline	Pre	Paxilline
# Cell	IR (MΩ)		Threshold current (pA)			# Cell	IR (MΩ)		Threshold current (pA)			# Cell	IR (MΩ)		Threshold current (pA)			# Cell	IR (MΩ)		Threshold current (pA)
sy-0235	128.571	151.429	160	130		sy-0232	337.143	434.286	100	80		sy-0248	205.714	202.857	160	170		sy-0256	357.143	328.571	110	100
sy-0236	197.143	251.429	180	140		sy-0233	260	300	120	90		sy-0249	217.143	268.571	150	140		sy-0259	257.143	262.857	150	140
sy-0237	182.857	297.143	120	50		sy-0243	260	331.429	130	100		sy-0250	202.857	251.429	170	170		sy-0260	300	317.143	130	130
sy-0238	237.143	300	160	110		sy-0244	374.286	434.286	110	90		sy-0251	174.286	137.143	170	180		sy-0261	331.429	357.143	130	110
sy-0239	225.714	297.143	140	110		sy-0245	245.714	254.286	170	130		sy-0252	208.571	262.857	160	160
sy-0229	185.714	271.429	230	170		sy-0246	405.714	414.286	90	80		sy-0253	208.571	205.714	200	180		Mean	311.429	316.429	130	120
						sy-0247	360	451.429	90	80								SEM	21.5394	19.7389	8.16497	9.12871
Mean	192.857	261.429	165	118.333								Mean	202.857	221.429	168.333	166.667		p value	0.703027		0.0917211
SEM	15.6449	23.3372	15.438	16.4148		Mean	320.408	374.286	115.714	92.8571		SEM	6.03843	20.4407	7.03167	6.14636
p value	0.00278605		0.000916748			SEM	26.3022	31.8443	10.6586	6.80136		p value	0.286611		0.741154
						p value	0.00778282		0.00161001
