# Supplementary material for: Protein arginine methylation facilitates KCNQ channel-PIP2 interaction leading to seizure suppression
Source: eLife. 2016 Jul 28;5:e17159. doi: 10.7554/eLife.17159 (PMC4996652; doi:10.7554/eLife.17159)
Supplement: Figure 9—figure supplement 1—source data 1. — DOI: http://dx.doi.org/10.7554/eLife.17159.038 [file elife-17159-fig9-figsupp1-data1.xlsx]

## Sheet: SFig10
panel a (Left)
						mean	SEM	P value
WT	2.546	2.1334	2.723	2.6236	2.734	2.552	0.11017	p = 6.28902E-6
CCC-AAA	1.03	1.0943	0.994	0.95502		1.01833	0.02959
panel a (Right)
						mean	SEM	P value
WT	4.3546	2.12705	2.9438	3.31	2.913	3.12969	0.36192	p = 0.27832
CCC-AAA	3.784	3.5843	3.94	3.23838		3.63667	0.15141
Panel b
								mean	SEM	P value
WT	102.16	69.54	124.89	26.27	90.16	58.34	87.94	79.9	12.0888	p = 0.58891
CCC-AAA	98.45	105.54	31.54	35.23				67.69	19.8731
Panel c
								mean	SEM	P value
WT	75.1	77.54	82.15	61.587	72.34	70.54	65.45	72.1	2.65847	p = 0.79309
CCC-AAA	78.45	125.54	29.54	37.17				67.675	22.0781
